# Supplementary material
Source: Springer Nature journal article supplement (https://www.springermedizin.de/resource/supplementary/12889_2005_384_MOESM2_ESM.pdf/9501460)

Frequency

4000

3500

3000

2500

2000

1500

1000

500

0

F

M

F

M

F

M

F

M

F

M

F

M

F

M

F

M

SEX

20-29

30-39

40-49

50-59

60-69

70-79

80-89

90-99

AGE

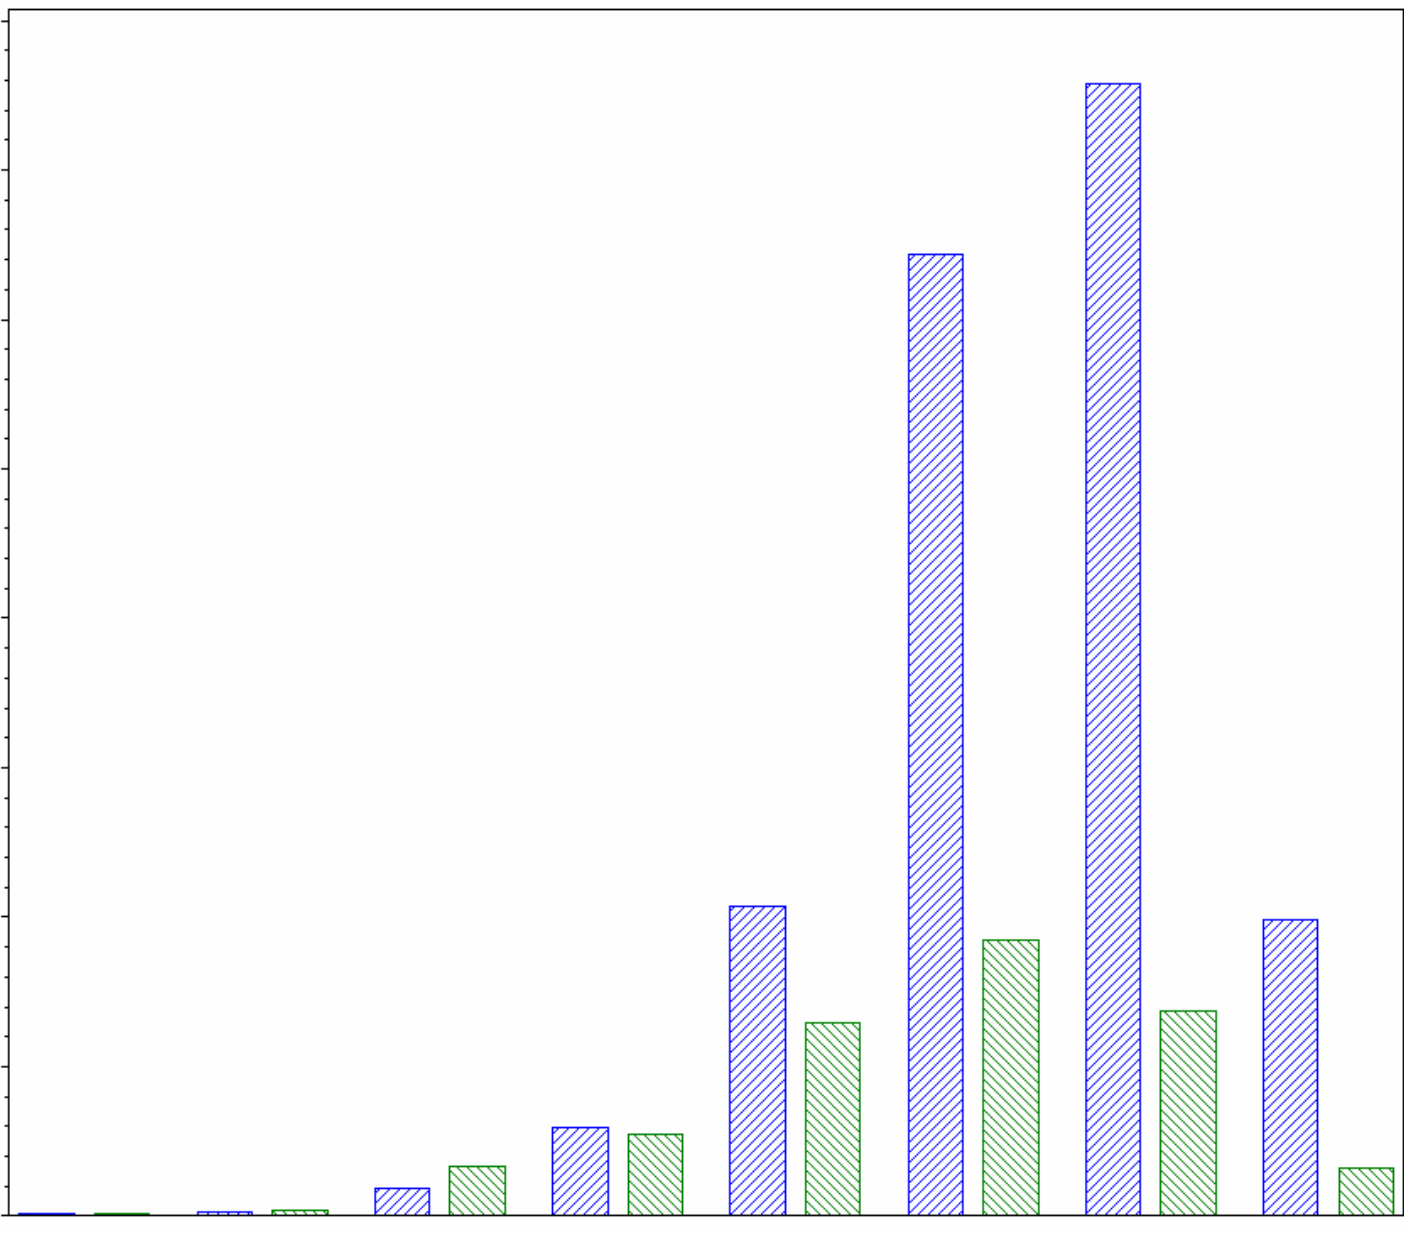

Supplement: MOESM2 [file 9501460]
